# Supplementary material for: Genetic Characterization and Phylogeographic Analysis of the First H13N6 Avian Influenza Virus Isolated from Vega Gull in South Korea
Source: MDPI journal article supplement (doi:10.3390/v16020285), 2024-02-12
Supplement: s1 [file s1]

**Table S1.** Lists of primers used for the amplification of the eight vRNA segments of Influenza A virus

| Name          | Purpose        | Sequence (5'-3') <sup>a</sup>     | Target segment | Size (bp) | Reference                                                                                                                                                                                                                                                       |
|---------------|----------------|-----------------------------------|----------------|-----------|-----------------------------------------------------------------------------------------------------------------------------------------------------------------------------------------------------------------------------------------------------------------|
| Uni12         | cDNA synthesis | AGCAAAAGCAGG                      | All            |           |                                                                                                                                                                                                                                                                 |
| Bm-NP-1       | PCR            | AGCAAAAGCAGGGTA                   | NP             | 1565      | Hoffmann, E.; Stech, J.; Guan, Y.; Webster, R.G.; Perez, D.R. Universal Primer Set for the Full-Length Amplification of All Influenza A Viruses. Arch. Virol. 2001, 146, 2275–2289.                                                                             |
| Bm-NP-1565R   |                | AGTAGAAACAAGGGTATTTTT             |                |           |                                                                                                                                                                                                                                                                 |
| Bm-M-1F       | PCR            | AGCAAAAGCAGGTAG                   | MA             | 1027      |                                                                                                                                                                                                                                                                 |
| Bm-M-1027R    |                | AGTAGAAACAAGGTAGTTTTT             |                |           |                                                                                                                                                                                                                                                                 |
| Bm-NS-1F      | PCR            | AGCAAAAGCAGGGTG                   | NS             | 890       |                                                                                                                                                                                                                                                                 |
| Bm-NS-890R    |                | AGTAGAAACAAGGGTGTTTT              |                |           |                                                                                                                                                                                                                                                                 |
| Bm-PA-1       | PCR            | TATTCGTCTCAGGGAGCGAAAGCAGGTAC     | PA             | 2233      | Li, O.T.W.; Barr, I.; Leung, C.Y.H.; Chen, H.; Guan, Y.; Peiris, J.S.M.; Poon, L.L.M. Reliable Universal RT-PCR Assays for Studying Influenza Polymerase Subunit Gene Sequences from All 16 Haemagglutinin Subtypes. J. Virol. Methods 2007, 142, 218–222.      |
| PA-1498R      |                | TNGTYCTRCAYTTGCTTATCAT            |                |           |                                                                                                                                                                                                                                                                 |
| PA-747F       |                | CATTGAGGGCAAGCTTTC                |                |           |                                                                                                                                                                                                                                                                 |
| Bm-PA-2233R   |                | ATATCGTCTCGTATTAGTAGAAACAAGGTACTT |                |           |                                                                                                                                                                                                                                                                 |
| Bm-PB1-1      | PCR            | TATTCGTCTCAGGGAGCGAAAGCAGGCA      | PB1            | 2341      |                                                                                                                                                                                                                                                                 |
| PB1-1262R     |                | TTRAACATGCCCATCATCAT              |                |           |                                                                                                                                                                                                                                                                 |
| PB1-1124F     |                | ARATACCNGCAGARATGCT               |                |           |                                                                                                                                                                                                                                                                 |
| Bm-PB1-2341R  |                | ATATCGTCTCGTATTAGTAGAAACAAGGCA    |                |           |                                                                                                                                                                                                                                                                 |
| Bm-PB2-1      | PCR            | TATTGGTCTCAGGGAGCGAAAGCAGGTC      | PB2            | 2341      |                                                                                                                                                                                                                                                                 |
| PB2-1250R     |                | TCYTCYTGTGARAAYACCAT              |                |           |                                                                                                                                                                                                                                                                 |
| PB2-1105F     |                | TAYGARGARTTCACAATGGT              |                |           |                                                                                                                                                                                                                                                                 |
| Bm-PB2-2341R  |                | ATATGGTCTCGTATTAGTAGAAACAAGGTCG   |                |           |                                                                                                                                                                                                                                                                 |
| HA-1          | PCR            | AGCAAAAGCAGGGG                    | HA             | 1778      | Chan, C.H.; Lin, K.L.; Chan, Y.; Wang, Y.L.; Chi, Y.T.; Tu, H.L.; Shieh, H.K.; Liu, W.T. Amplification of the Entire Genome of Influenza A Virus H1N1 and H3N2 Subtypes by Reverse-Transcription Polymerase Chain Reaction. J. Virol. Methods 2006, 136, 38–43. |
| HA-1778R      |                | AGTAGAAACAAGGGTGTTTT              |                |           |                                                                                                                                                                                                                                                                 |
| AIV-NA-BO-F13 | PCR            | GGGAGCAAAAGCAGGAGTRAARATGAA       | NA             | 1413      | Orozovic, G.; Latorre-Margalef, N.; Wahlgren, J.; Muradrasoli, S.; Olsen, B. Degenerate Primers for PCR Amplification and Sequencing of the Avian Influenza A Neuraminidase Gene. J. Virol. Methods 2010, 170, 94–98.                                           |
| AIV-NA-BO-F11 |                | GGGAGCAAAAGCAGGKSRMDATGAATC       |                |           |                                                                                                                                                                                                                                                                 |
| AIV-NA-BO-R   |                | GGGAGTAGAAACAAGGDBNTTTTTB         |                |           |                                                                                                                                                                                                                                                                 |

<sup>a</sup>Codes for mixed bases position: R= A/G, Y=C/T
