# Supplementary material for: Genetic Characterization and Phylogeographic Analysis of the First H13N6 Avian Influenza Virus Isolated from Vega Gull in South Korea
Source: MDPI journal article supplement (doi:10.3390/v16020285), 2024-02-12
Supplement: s1 [file s1]

**Table S5.** List of isolates used in this study for HA gene analysis

| ISOLATE ID                                                               | LOCATION      | HOST           |
|--------------------------------------------------------------------------|---------------|----------------|
| AAA43213_A_black-headed_gull_Astrakhan_227_1984_H13N6                    | Europe        | Gull           |
| AAA43214_A_ring-billed_gull_Maryland_704_1977_H13N6                      | North America | Gull           |
| AAA43215_A_pilot_whale_Maine_328_HN_1984_H13N2                           | North America | Mammal         |
| AAV91212_A_black-headed_gull_Netherlands_1_2000_H13N8                    | Europe        | Gull           |
| AAV91213_A_black-headed_gull_Sweden_1_1999_H13N6                         | Europe        | Gull           |
| ABB86511_A_herring_gull_DE_475_1986_H13N2                                | North America | Gull           |
| ABB87334_A_shorebird_DE_68_2004_H13N9                                    | North America | Shorebird      |
| ABB87345_A_herring_gull_NJ_782_1986_H13N2                                | North America | Gull           |
| ABB87811_A_laughing_gull_Delaware_Bay_2838_1987_H13N2                    | North America | Gull           |
| ABI84452_A_herring_gull_Delaware_660_1988_H13N6                          | North America | Gull           |
| ABI84566_A_gull_Maryland_704_1977_H13N6                                  | North America | Gull           |
| ABI84601_A_gull_Minnesota_945_1980_H13N6                                 | North America | Gull           |
| ACA48469_A_great_black-headed_gull_Astrakhan_1420_1979_H13N2             | Europe        | Gull           |
| ACA48471_A_great_black-headed_gull_Astrakhan_591_1982_H13N2              | Europe        | Gull           |
| ACD40325_A_kelp_gull_Argentina_LDC4_2006_H13N9                           | South America | Gull           |
| ACE78933_A_Larus_ichthyaetus_Astrakhan_10_1988_H13N6                     | Europe        | Gull           |
| ACE78934_A_Larus_ichthyaetus_Astrakhan_75_1983_H13N2                     | Europe        | Gull           |
| ACE78935_A_Larus_minutus_Astrakhan_3357_2002_H13N6                       | Europe        | Gull           |
| ACE78942_A_black-headed_gull_Astrakhan_44_1988_H13N6                     | Europe        | Gull           |
| ACE78983_A_gull_Astrakhan_1846_1998_H13N6                                | Europe        | Gull           |
| ACE78984_A_black-headed_gull_Astrakhan_65_1983_H13N6                     | Europe        | Gull           |
| ACF04701_A_gull_Astrakhan_226_1984_H13N6                                 | Europe        | Gull           |
| ACF04702_A_gull_Astrakhan_998_1990_H13N6                                 | Europe        | Gull           |
| ACF04703_A_gull_Astrakhan_3483_2002_H13N6                                | Europe        | Gull           |
| ACF04704_A_gull_Astrakhan_1314_1979_H13N2                                | Europe        | Gull           |
| ACF04705_A_gull_Astrakhan_176_1986_H13N2                                 | Europe        | Gull           |
| ACF04706_A_gull_Astrakhan_1818_1998_H13N6                                | Europe        | Gull           |
| ACU15632_A_shorebird_Delaware_221_2006_H13N9                             | North America | Shorebird      |
| ACV86830_A_black_headed_gull_Mongolia_1766_2006_H13N6                    | Asia          | Gull           |
| ACV86840_A_Mongolian_gull_Mongolia_401_2007_H13N6                        | Asia          | Gull           |
| ACV86850_A_Mongolian_gull_Mongolia_405_2007_H13N6                        | Asia          | Gull           |
| ADB46159_A_American_white_pelican_Minnesota_AI-07-1819_2007_H13N9        | North America | Pelecaniformes |
| ADB46161_A_American_white_pelican_Minnesota_Sg-0611_2008_H13N9           | North America | Pelecaniformes |
| ADD92017_A_great_black-headed_gull_Atyrau_743_2004_H13N6                 | Asia          | Gull           |
| ADD92020_A_great_black-headed_gull_Atyrau_773_2004_H13N6                 | Asia          | Gull           |
| ADF29822_A_glaucous_gull_Alaska_44199-097_2006_H13N3                     | North America | Gull           |
| ADM07067_A_glaucous-winged_gull_Southcentral_Alaska_9JR0738R0_2009_H13N6 | North America | Gull           |
| ADM07078_A_glaucous-winged_gull_Southcentral_Alaska_9JR0747R0_2009_H13N6 | North America | Gull           |
| ADM07089_A_glaucous-winged_gull_Southcentral_Alaska_9JR0769R0_2009_H13N6 | North America | Gull           |
| ADQ26640_A_black-headed_gull_Sweden_1_2005_H13N8                         | Europe        | Gull           |
| AEB71102_A_herring_gull_Mongolia_454_2008_H13N8                          | Asia          | Gull           |
| AFL56747_A_mallard_Korea_SH38-45_2010_H13N2                              | Asia          | Anseriformes   |
| AFP20992_A_black-legged_kittiwake_Quebec_02838-1_2009_H13N6              | North America | Gull           |
| AFP21003_A_hooded_merganser_New_Brunswick_03750_2009_H13N6               | North America | Anseriformes   |
| AFX83972_A_ruddy_turnstone_Delaware_Bay_520_1988_H13N9                   | North America | Shorebird      |
| AFX86009_A_shorebird_Delaware_Bay_424_2007_H13N9                         | North America | Shorebird      |
| AGB51312_A_gull_Maryland_704_1977_H13N6                                  | North America | Gull           |
| AGB98183_A_glaucous-winged_gull_Southeastern_Alaska_9JR0822R0_2009_H13N6 | North America | Gull           |
| AGK42180_A_laughing_gull_New_Jersey_Sg-00568_2008_H13N9                  | North America | Gull           |
| AGL57547_A_ring-billed_gull_Georgia_AI00-2658_2000_H13N6                 | North America | Gull           |
| AGL58701_A_laughing_gull_New_Jersey_Sg-00485_2008_H13N9                  | North America | Gull           |
| AGL60134_A_ruddy_turnstone_New_Jersey_AI09-294_2009_H13N6                | North America | Shorebird      |
| AHJ58189_A_whale_Maine_328B_1984_H13N2                                   | North America | Mammal         |
| AHZ38827_A_black-headed_gull_Sweden_74342_2008_H13N8                     | Europe        | Gull           |
| AHZ39225_A_black-headed_gull_Republic_of_Georgia_7_2011_H13N6            | Europe        | Gull           |
| AHZ39237_A_yellow-legged_gull_Georgia_1_2011_H13N6                       | Europe        | Gull           |
| AHZ39284_A_black-headed_gull_Georgia_1_2011_H13N8                        | Europe        | Gull           |
| AHZ39308_A_black-headed_gull_Georgia_3_2011_H13N8                        | Europe        | Gull           |
| AHZ39380_A_black-headed_gull_Republic_of_Georgia_2_2012_H13N6            | Europe        | Gull           |
| AHZ39439_A_yellow-legged_gull_Republic_of_Georgia_2_2012_H13N6           | Europe        | Gull           |
| AHZ39451_A_yellow-legged_gull_Republic_of_Georgia_3_2012_H13N6           | Europe        | Gull           |
| AHZ39475_A_yellow-legged_gull_Georgia_1_2013_H13N8                       | Europe        | Gull           |
| AHZ39546_A_black-headed_gull_Georgia_9_2011_H13N8                        | Europe        | Gull           |
| AHZ39602_A_yellow-legged_gull_Republic_of_Georgia_6_2012_H13N6           | Europe        | Gull           |
| ALX94903_A_gull_Maryland_16_1985_H13N2                                   | North America | Gull           |
| ALZ46747_A_ring-billed_gull_Massachusetts_12DC00060_2012_H13N6           | North America | Gull           |
| ALZ46771_A_gull_Massachusetts_12JR00671_2012_H13N6                       | North America | Gull           |
| ALZ46978_A_ring-billed_gull_Massachusetts_13DC30736-1_2013_H13N8         | North America | Gull           |
| AMP44543_A_slender-billed_gull_CHBZ_11_2009_H13N2                        | Europe        | Gull           |
| ANT47310_A_herring_gull_Finland_9875_2005_H13                            | Europe        | Gull           |
| ANT47311_A_herring_gull_Finland_9330_2007_H13                            | Europe        | Gull           |
| ANT47312_A_herring_gull_Finland_9611_2007_H13                            | Europe        | Gull           |
| APY16558_A_glaucous-winged_gull_Southcentral_Alaska_15MB01557_2015_H13N6 | North America | Gull           |
| APY16570_A_glaucous-winged_gull_Southcentral_Alaska_15MB01429_2015_H13N6 | North America | Gull           |
| APY16582_A_glaucous-winged_gull_Southcentral_Alaska_15MB01632_2015_H13N6 | North America | Gull           |

|                                                                          |               |              |
|--------------------------------------------------------------------------|---------------|--------------|
| APY16670_A_glaucous-winged_gull_Southcentral_Alaska_15MB02016_2015_H13N8 | North America | Gull         |
| BAA14338_A_gull_Maryland_704_1977_H13N6                                  | North America | Gull         |
| BAF37821_A_duck_Siberia_272_1998_H13N6                                   | Asia          | Anseriformes |
| BAF38383_A_duck_Siberia_272PF_1998_H13N6                                 | Asia          | Anseriformes |
| BAF46906_A_gull_Maryland_704_1977_H13N6                                  | North America | Gull         |
| BAN14686_A_duck_Hokkaido_WZ68_2012_H13N2                                 | Asia          | Anseriformes |
| CAQ77191_A_herring_gull_Norway_10_2336_2006_H13N6                        | Europe        | Gull         |
| CCH50638_A_common_gull_Norway_10_1313_2009_H13N2                         | Europe        | Gull         |
| SKH13N6_HA                                                               | SKH13N6       | Gull         |

---
