# Supplementary material for: Genetic Characterization and Phylogeographic Analysis of the First H13N6 Avian Influenza Virus Isolated from Vega Gull in South Korea
Source: MDPI journal article supplement (doi:10.3390/v16020285), 2024-02-12
Supplement: s1 [file s1]

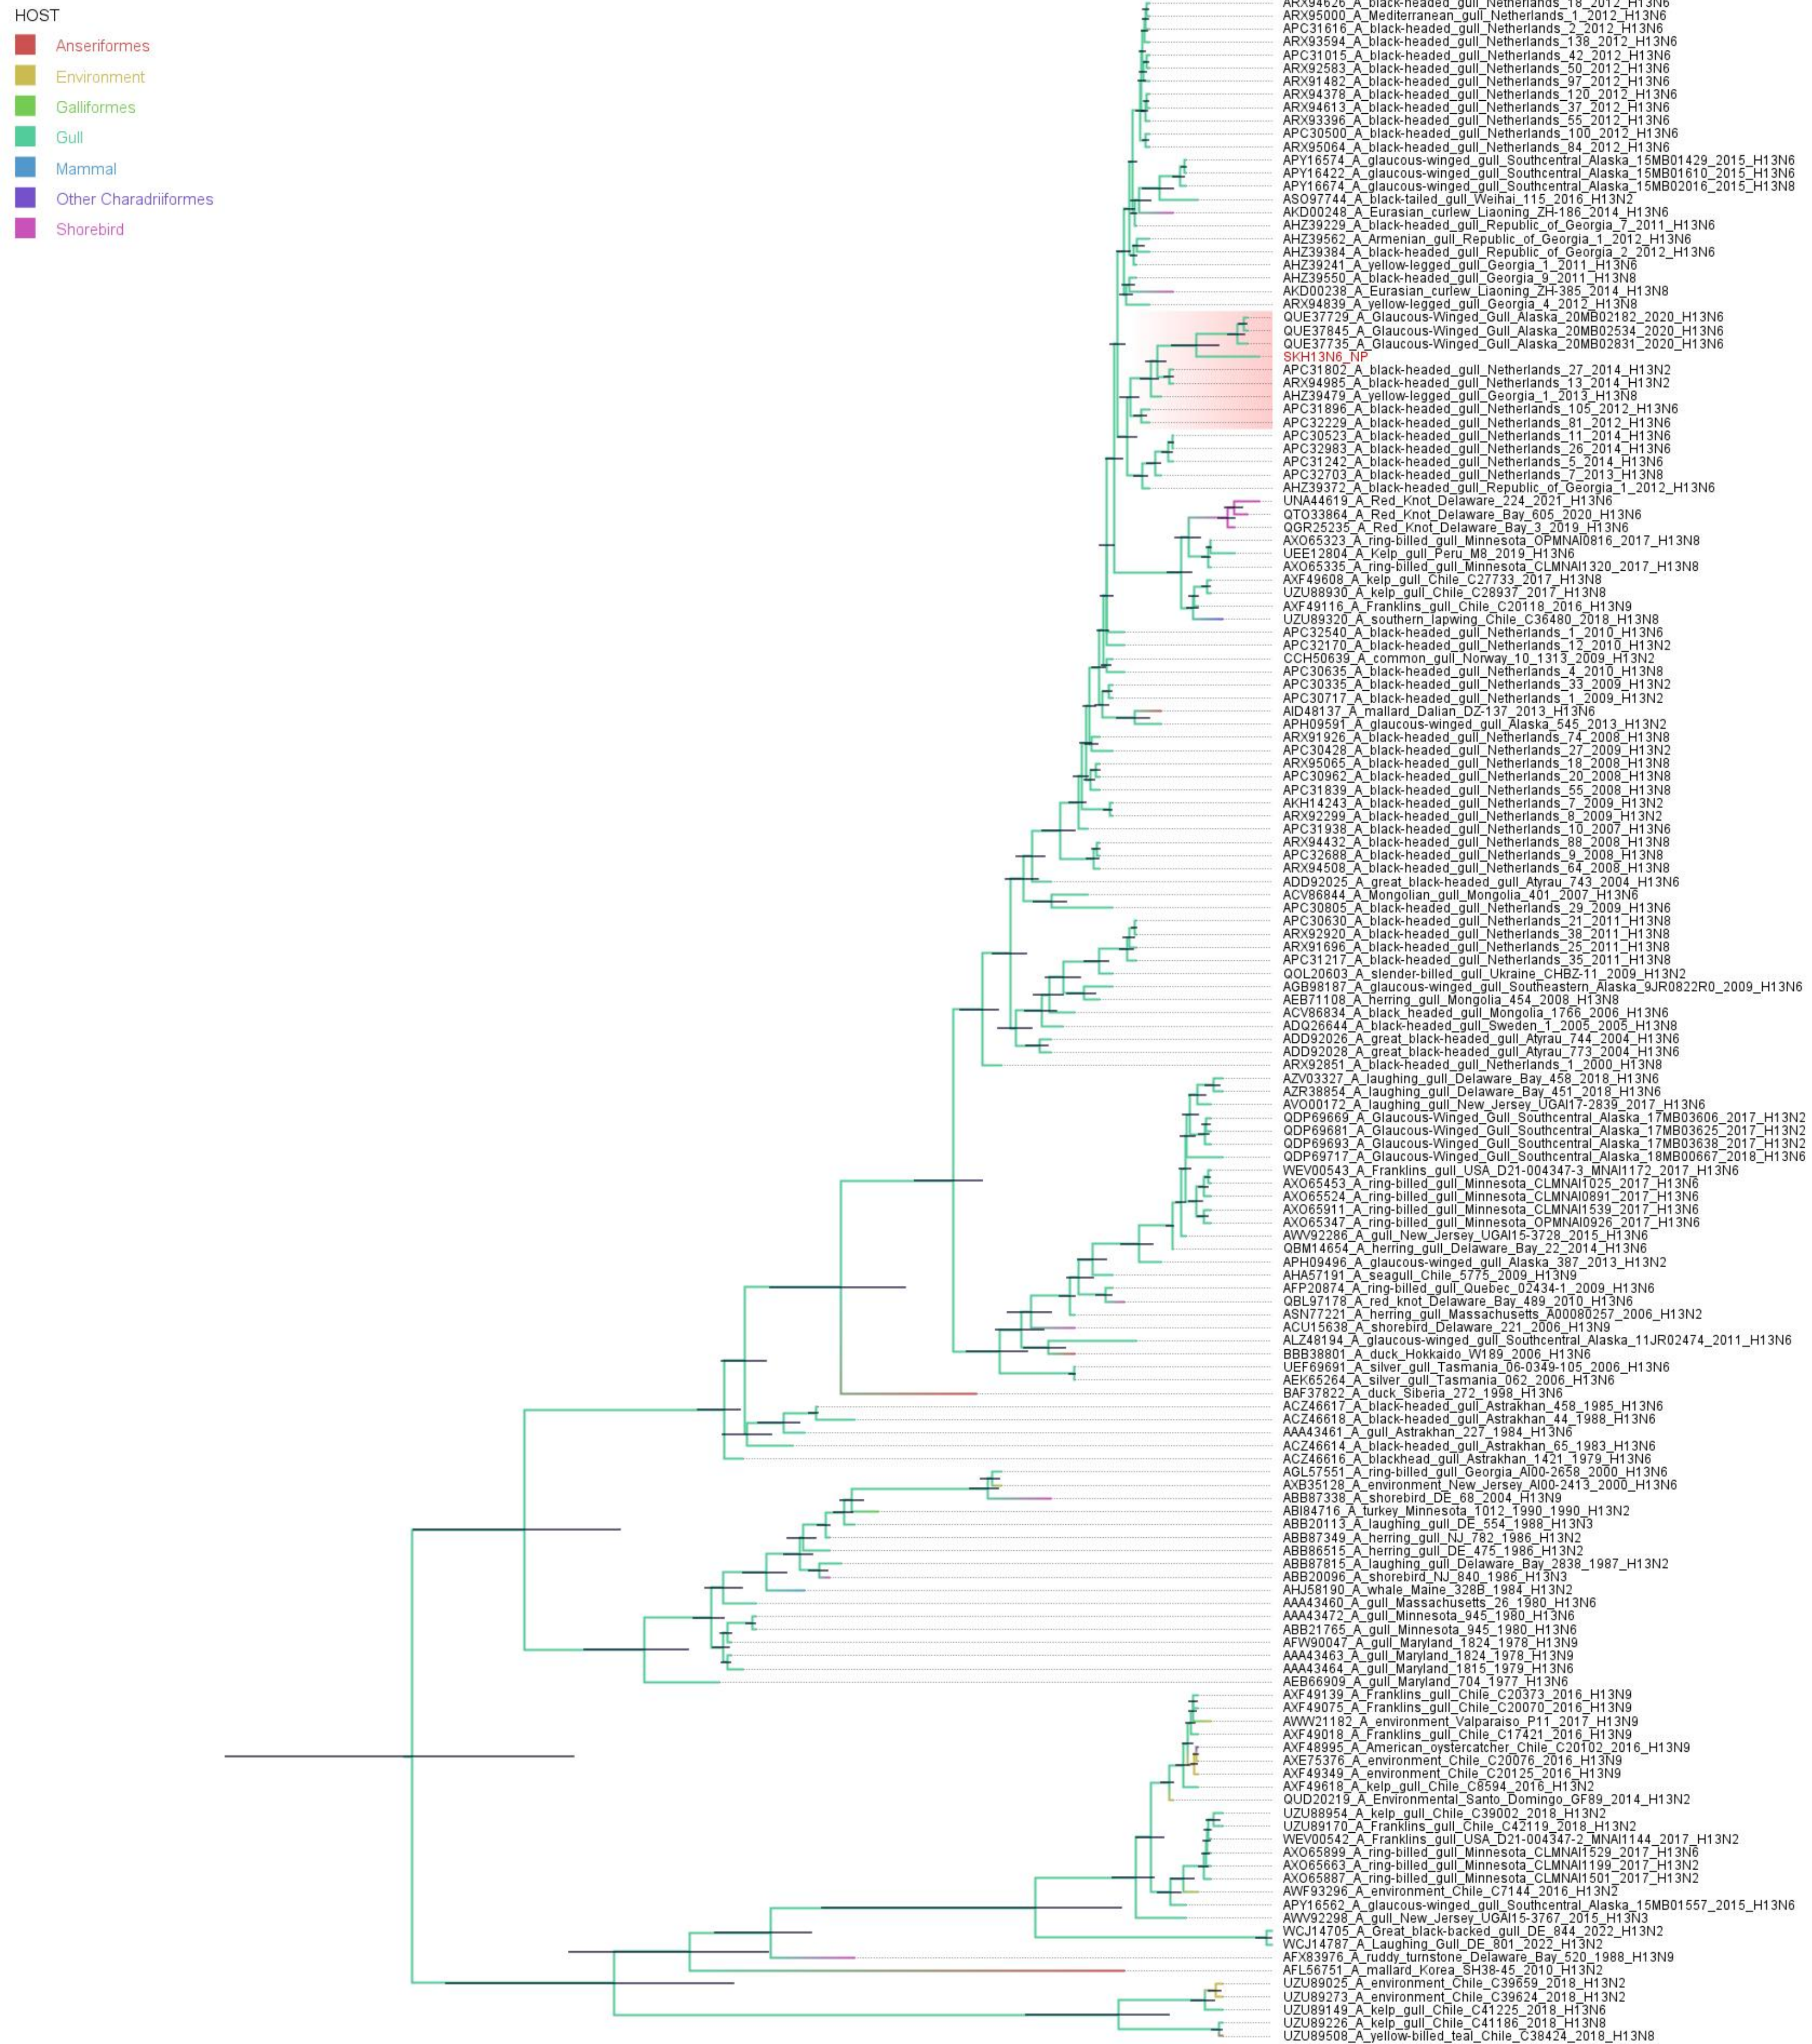

**Figure S5.** Phylogenetic tree of NP gene segment by host. Maximum Clade Credibility (MCC) tree highlights the host trait of H13Nx isolates NP gene segment (n=156). The cluster of SKH13N6 isolate is highlighted and the isolate is colored in red. Node bars indicate 95% Highest Posterior Density.
