# Supplementary material for: Genetic Characterization and Phylogeographic Analysis of the First H13N6 Avian Influenza Virus Isolated from Vega Gull in South Korea
Source: MDPI journal article supplement (doi:10.3390/v16020285), 2024-02-12
Supplement: s1 [file s1]

**Table S6.** List of isolates used in this study for NP gene analysis

| ISOLATE ID                                                               | LOCATION      | HOST         |
|--------------------------------------------------------------------------|---------------|--------------|
| AAA43460_A_gull_Massachusetts_26_1980_H13N6                              | North America | Gull         |
| AAA43461_A_gull_Astrakhan_227_1984_H13N6                                 | Europe        | Gull         |
| AAA43463_A_gull_Maryland_1824_1978_H13N9                                 | North America | Gull         |
| AAA43464_A_gull_Maryland_1815_1979_H13N6                                 | North America | Gull         |
| AAA43472_A_gull_Minnesota_945_1980_H13N6                                 | North America | Gull         |
| ABB20096_A_shorebird_NJ_840_1986_H13N3                                   | North America | Shorebird    |
| ABB20113_A_laughing_gull_DE_554_1988_H13N3                               | North America | Gull         |
| ABB21765_A_gull_Minnesota_945_1980_H13N6                                 | North America | Gull         |
| ABB86515_A_herring_gull_DE_475_1986_H13N2                                | North America | Gull         |
| ABB87338_A_shorebird_DE_68_2004_H13N9                                    | North America | Shorebird    |
| ABB87349_A_herring_gull_NJ_782_1986_H13N2                                | North America | Gull         |
| ABB87815_A_laughing_gull_Delaware_Bay_2838_1987_H13N2                    | North America | Gull         |
| ABI84716_A_turkey_Minnesota_1012_1990_1990_H13N2                         | North America | Galliformes  |
| ACU15638_A_shorebird_Delaware_221_2006_H13N9                             | North America | Shorebird    |
| ACV86834_A_black_headed_gull_Mongolia_1766_2006_H13N6                    | Asia          | Gull         |
| ACV86844_A_Mongolian_gull_Mongolia_401_2007_H13N6                        | Asia          | Gull         |
| ACZ46614_A_black-headed_gull_Astrakhan_65_1983_H13N6                     | Europe        | Gull         |
| ACZ46616_A_blackhead_gull_Astrakhan_1421_1979_H13N6                      | Europe        | Gull         |
| ACZ46617_A_black-headed_gull_Astrakhan_458_1985_H13N6                    | Europe        | Gull         |
| ACZ46618_A_black-headed_gull_Astrakhan_44_1988_H13N6                     | Europe        | Gull         |
| ADD92025_A_great_black-headed_gull_Atyrau_743_2004_H13N6                 | Asia          | Gull         |
| ADD92026_A_great_black-headed_gull_Atyrau_744_2004_H13N6                 | Asia          | Gull         |
| ADD92028_A_great_black-headed_gull_Atyrau_773_2004_H13N6                 | Asia          | Gull         |
| ADQ26644_A_black-headed_gull_Sweden_1_2005_2005_H13N8                    | Europe        | Gull         |
| AEB66909_A_gull_Maryland_704_1977_H13N6                                  | North America | Gull         |
| AEB71108_A_herring_gull_Mongolia_454_2008_H13N8                          | Asia          | Gull         |
| AEK65264_A_silver_gull_Tasmania_062_2006_H13N6                           | Oceania       | Gull         |
| AFL56751_A_mallard_Korea_SH38-45_2010_H13N2                              | Asia          | Anseriformes |
| AFP20874_A_ring-billed_gull_Quebec_02434-1_2009_H13N6                    | North America | Gull         |
| AFW90047_A_gull_Maryland_1824_1978_H13N9                                 | North America | Gull         |
| AFX83976_A_ruddy_turnstone_Delaware_Bay_520_1988_H13N9                   | North America | Shorebird    |
| AGB98187_A_glaucous-winged_gull_Southeastern_Alaska_9JR0822R0_2009_H13N6 | North America | Gull         |
| AGL57551_A_ring-billed_gull_Georgia_AI00-2658_2000_H13N6                 | North America | Gull         |
| AHA57191_A_seagull_Chile_5775_2009_H13N9                                 | South America | Gull         |
| AHJ58190_A_whale_Maine_328B_1984_H13N2                                   | North America | Mammal       |
| AHZ39229_A_black-headed_gull_Republic_of_Georgia_7_2011_H13N6            | Europe        | Gull         |
| AHZ39241_A_yellow-legged_gull_Georgia_1_2011_H13N6                       | Europe        | Gull         |
| AHZ39372_A_black-headed_gull_Republic_of_Georgia_1_2012_H13N6            | Europe        | Gull         |
| AHZ39384_A_black-headed_gull_Republic_of_Georgia_2_2012_H13N6            | Europe        | Gull         |
| AHZ39479_A_yellow-legged_gull_Georgia_1_2013_H13N8                       | Europe        | Gull         |
| AHZ39550_A_black-headed_gull_Georgia_9_2011_H13N8                        | Europe        | Gull         |
| AHZ39562_A_Armenian_gull_Republic_of_Georgia_1_2012_H13N6                | Europe        | Gull         |
| AID48137_A_mallard_Dalian_DZ-137_2013_H13N6                              | Asia          | Anseriformes |
| AKD00238_A_Eurasian_curlew_Liaoning_ZH-385_2014_H13N8                    | Asia          | Shorebird    |
| AKD00248_A_Eurasian_curlew_Liaoning_ZH-186_2014_H13N6                    | Asia          | Shorebird    |
| AKH14243_A_black-headed_gull_Netherlands_7_2009_H13N2                    | Europe        | Gull         |
| ALZ48194_A_glaucous-winged_gull_Southcentral_Alaska_11JR02474_2011_H13N6 | North America | Gull         |
| APC30335_A_black-headed_gull_Netherlands_33_2009_H13N2                   | Europe        | Gull         |
| APC30428_A_black-headed_gull_Netherlands_27_2009_H13N2                   | Europe        | Gull         |
| APC30500_A_black-headed_gull_Netherlands_100_2012_H13N6                  | Europe        | Gull         |
| APC30523_A_black-headed_gull_Netherlands_11_2014_H13N6                   | Europe        | Gull         |
| APC30630_A_black-headed_gull_Netherlands_21_2011_H13N8                   | Europe        | Gull         |
| APC30635_A_black-headed_gull_Netherlands_4_2010_H13N8                    | Europe        | Gull         |
| APC30717_A_black-headed_gull_Netherlands_1_2009_H13N2                    | Europe        | Gull         |
| APC30805_A_black-headed_gull_Netherlands_29_2009_H13N6                   | Europe        | Gull         |
| APC30962_A_black-headed_gull_Netherlands_20_2008_H13N8                   | Europe        | Gull         |
| APC31015_A_black-headed_gull_Netherlands_42_2012_H13N6                   | Europe        | Gull         |
| APC31217_A_black-headed_gull_Netherlands_35_2011_H13N8                   | Europe        | Gull         |
| APC31242_A_black-headed_gull_Netherlands_5_2014_H13N6                    | Europe        | Gull         |
| APC31616_A_black-headed_gull_Netherlands_2_2012_H13N6                    | Europe        | Gull         |
| APC31802_A_black-headed_gull_Netherlands_27_2014_H13N2                   | Europe        | Gull         |
| APC31839_A_black-headed_gull_Netherlands_55_2008_H13N8                   | Europe        | Gull         |
| APC31896_A_black-headed_gull_Netherlands_105_2012_H13N6                  | Europe        | Gull         |
| APC31938_A_black-headed_gull_Netherlands_10_2007_H13N6                   | Europe        | Gull         |
| APC32170_A_black-headed_gull_Netherlands_12_2010_H13N2                   | Europe        | Gull         |
| APC32229_A_black-headed_gull_Netherlands_81_2012_H13N6                   | Europe        | Gull         |
| APC32540_A_black-headed_gull_Netherlands_1_2010_H13N6                    | Europe        | Gull         |
| APC32688_A_black-headed_gull_Netherlands_9_2008_H13N8                    | Europe        | Gull         |
| APC32703_A_black-headed_gull_Netherlands_7_2013_H13N8                    | Europe        | Gull         |
| APC32983_A_black-headed_gull_Netherlands_26_2014_H13N6                   | Europe        | Gull         |
| APH09496_A_glaucous-winged_gull_Alaska_387_2013_H13N2                    | Europe        | Gull         |
| APH09591_A_glaucous-winged_gull_Alaska_545_2013_H13N2                    | Europe        | Gull         |
| APY16422_A_glaucous-winged_gull_Southcentral_Alaska_15MB01610_2015_H13N6 | Europe        | Gull         |
| APY16562_A_glaucous-winged_gull_Southcentral_Alaska_15MB01557_2015_H13N6 | Europe        | Gull         |
| APY16574_A_glaucous-winged_gull_Southcentral_Alaska_15MB01429_2015_H13N6 | Europe        | Gull         |
| APY16674_A_glaucous-winged_gull_Southcentral_Alaska_15MB02016_2015_H13N8 | Europe        | Gull         |
| ARX91482_A_black-headed_gull_Netherlands_97_2012_H13N6                   | Europe        | Gull         |
| ARX91696_A_black-headed_gull_Netherlands_25_2011_H13N8                   | Europe        | Gull         |

|                                                                          |               |                       |
|--------------------------------------------------------------------------|---------------|-----------------------|
| ARX91926_A_black-headed_gull_Netherlands_74_2008_H13N8                   | Europe        | Gull                  |
| ARX92299_A_black-headed_gull_Netherlands_8_2009_H13N2                    | Europe        | Gull                  |
| ARX92583_A_black-headed_gull_Netherlands_50_2012_H13N6                   | Europe        | Gull                  |
| ARX92851_A_black-headed_gull_Netherlands_1_2000_H13N8                    | Europe        | Gull                  |
| ARX92920_A_black-headed_gull_Netherlands_38_2011_H13N8                   | Europe        | Gull                  |
| ARX93396_A_black-headed_gull_Netherlands_55_2012_H13N6                   | Europe        | Gull                  |
| ARX93594_A_black-headed_gull_Netherlands_138_2012_H13N6                  | Europe        | Gull                  |
| ARX94378_A_black-headed_gull_Netherlands_120_2012_H13N6                  | Europe        | Gull                  |
| ARX94432_A_black-headed_gull_Netherlands_88_2008_H13N8                   | Europe        | Gull                  |
| ARX94508_A_black-headed_gull_Netherlands_64_2008_H13N8                   | Europe        | Gull                  |
| ARX94613_A_black-headed_gull_Netherlands_37_2012_H13N6                   | Europe        | Gull                  |
| ARX94626_A_black-headed_gull_Netherlands_18_2012_H13N6                   | Europe        | Gull                  |
| ARX94839_A_yellow-legged_gull_Georgia_4_2012_H13N8                       | Europe        | Gull                  |
| ARX94985_A_black-headed_gull_Netherlands_13_2014_H13N2                   | Europe        | Gull                  |
| ARX95000_A_Mediterranean_gull_Netherlands_1_2012_H13N6                   | Europe        | Gull                  |
| ARX95064_A_black-headed_gull_Netherlands_84_2012_H13N6                   | Europe        | Gull                  |
| ARX95065_A_black-headed_gull_Netherlands_18_2008_H13N8                   | Europe        | Gull                  |
| ASN77221_A_herring_gull_Massachusetts_A00080257_2006_H13N2               | North America | Gull                  |
| ASO97744_A_black-tailed_gull_Weihai_115_2016_H13N2                       | Asia          | Gull                  |
| AVO00172_A_laughing_gull_New_Jersey_UGAI17-2839_2017_H13N6               | North America | Gull                  |
| AWF93296_A_environment_Chile_C7144_2016_H13N2                            | South America | Environment           |
| AWV92286_A_gull_New_Jersey_UGAI15-3728_2015_H13N6                        | North America | Gull                  |
| AWV92298_A_gull_New_Jersey_UGAI15-3767_2015_H13N3                        | North America | Gull                  |
| AWW21182_A_environment_Valparaiso_P11_2017_H13N9                         | South America | Environment           |
| AXB35128_A_environment_New_Jersey_AI00-2413_2000_H13N6                   | North America | Environment           |
| AXE75376_A_environment_Chile_C20076_2016_H13N9                           | South America | Environment           |
| AXF48995_A_American_oystercatcher_Chile_C20102_2016_H13N9                | South America | Other Charadriiformes |
| AXF49018_A_Franklins_gull_Chile_C17421_2016_H13N9                        | South America | Gull                  |
| AXF49075_A_Franklins_gull_Chile_C20070_2016_H13N9                        | South America | Gull                  |
| AXF49116_A_Franklins_gull_Chile_C20118_2016_H13N9                        | South America | Gull                  |
| AXF49139_A_Franklins_gull_Chile_C20373_2016_H13N9                        | South America | Gull                  |
| AXF49349_A_environment_Chile_C20125_2016_H13N9                           | South America | Environment           |
| AXF49608_A_kelp_gull_Chile_C27733_2017_H13N8                             | South America | Gull                  |
| AXF49618_A_kelp_gull_Chile_C8594_2016_H13N2                              | South America | Gull                  |
| AXO65323_A_ring-billed_gull_Minnesota_OPMNAI0816_2017_H13N8              | North America | Gull                  |
| AXO65335_A_ring-billed_gull_Minnesota_CLMNAI1320_2017_H13N8              | North America | Gull                  |
| AXO65347_A_ring-billed_gull_Minnesota_OPMNAI0926_2017_H13N6              | North America | Gull                  |
| AXO65453_A_ring-billed_gull_Minnesota_CLMNAI1025_2017_H13N6              | North America | Gull                  |
| AXO65524_A_ring-billed_gull_Minnesota_CLMNAI0891_2017_H13N6              | North America | Gull                  |
| AXO65663_A_ring-billed_gull_Minnesota_CLMNAI1199_2017_H13N2              | North America | Gull                  |
| AXO65887_A_ring-billed_gull_Minnesota_CLMNAI1501_2017_H13N2              | North America | Gull                  |
| AXO65899_A_ring-billed_gull_Minnesota_CLMNAI1529_2017_H13N6              | North America | Gull                  |
| AXO65911_A_ring-billed_gull_Minnesota_CLMNAI1539_2017_H13N6              | North America | Gull                  |
| AZR38854_A_laughing_gull_Delaware_Bay_451_2018_H13N6                     | North America | Gull                  |
| AZV03327_A_laughing_gull_Delaware_Bay_458_2018_H13N6                     | North America | Gull                  |
| BAF37822_A_duck_Siberia_272_1998_H13N6                                   | Asia          | Anseriformes          |
| BBB38801_A_duck_Hokkaido_W189_2006_H13N6                                 | Asia          | Anseriformes          |
| CCH50639_A_common_gull_Norway_10_1313_2009_H13N2                         | Europe        | Gull                  |
| QBL97178_A_red_knot_Delaware_Bay_489_2010_H13N6                          | North America | Shorebird             |
| QBM14654_A_herring_gull_Delaware_Bay_22_2014_H13N6                       | North America | Gull                  |
| QDP69669_A_Glaucous-Winged_Gull_Southcentral_Alaska_17MB03606_2017_H13N2 | North America | Gull                  |
| QDP69681_A_Glaucous-Winged_Gull_Southcentral_Alaska_17MB03625_2017_H13N2 | North America | Gull                  |
| QDP69693_A_Glaucous-Winged_Gull_Southcentral_Alaska_17MB03638_2017_H13N2 | North America | Gull                  |
| QDP69717_A_Glaucous-Winged_Gull_Southcentral_Alaska_18MB00667_2018_H13N6 | North America | Gull                  |
| QGR25235_A_Red_Knot_Delaware_Bay_3_2019_H13N6                            | North America | Shorebird             |
| QOL20603_A_slender-billed_gull_Ukraine_CHBZ-11_2009_H13N2                | Europe        | Gull                  |
| QTO33864_A_Red_Knot_Delaware_Bay_605_2020_H13N6                          | North America | Shorebird             |
| QUD20219_A_Environmental_Santo_Domingo_GF89_2014_H13N2                   | South America | Environment           |
| QUE37729_A_Glaucous-Winged_Gull_Alaska_20MB02182_2020_H13N6              | North America | Gull                  |
| QUE37735_A_Glaucous-Winged_Gull_Alaska_20MB02831_2020_H13N6              | North America | Gull                  |
| QUE37845_A_Glaucous-Winged_Gull_Alaska_20MB02534_2020_H13N6              | North America | Gull                  |
| SKH13N6_NP                                                               | SKH13N6       | Gull                  |
| UEE12804_A_Kelp_gull_Peru_M8_2019_H13N6                                  | South America | Gull                  |
| UEF69691_A_silver_gull_Tasmania_06-0349-105_2006_H13N6                   | Oceania       | Gull                  |
| UNA44619_A_Red_Knot_Delaware_224_2021_H13N6                              | North America | Shorebird             |
| UZU88930_A_kelp_gull_Chile_C28937_2017_H13N8                             | South America | Gull                  |
| UZU88954_A_kelp_gull_Chile_C39002_2018_H13N2                             | South America | Gull                  |
| UZU89025_A_environment_Chile_C39659_2018_H13N2                           | South America | Environment           |
| UZU89149_A_kelp_gull_Chile_C41225_2018_H13N6                             | South America | Gull                  |
| UZU89170_A_Franklins_gull_Chile_C42119_2018_H13N2                        | South America | Gull                  |
| UZU89226_A_kelp_gull_Chile_C41186_2018_H13N8                             | South America | Gull                  |
| UZU89273_A_environment_Chile_C39624_2018_H13N2                           | South America | Environment           |
| UZU89320_A_southern_lapwing_Chile_C36480_2018_H13N8                      | South America | Other Charadriiformes |
| UZU89508_A_yellow-billed_teal_Chile_C38424_2018_H13N8                    | South America | Anseriformes          |
| WCJ14705_A_Great_black-backed_gull_DE_844_2022_H13N2                     | North America | Gull                  |
| WCJ14787_A_Laughing_Gull_DE_801_2022_H13N2                               | North America | Gull                  |
| WEV00542_A_Franklins_gull_USA_D21-004347-2_MNAI1144_2017_H13N2           | North America | Gull                  |
| WEV00543_A_Franklins_gull_USA_D21-004347-3_MNAI1172_2017_H13N6           | North America | Gull                  |
