# Supplementary material for: Genetic Characterization and Phylogeographic Analysis of the First H13N6 Avian Influenza Virus Isolated from Vega Gull in South Korea
Source: MDPI journal article supplement (doi:10.3390/v16020285), 2024-02-12
Supplement: s1 [file s1]

**Table S8.** List of isolates used in this study for M gene analysis

| ISOLATE ID                                                               | LOCATION      | HOST         |
|--------------------------------------------------------------------------|---------------|--------------|
| AB284991_A_duck_Siberia_272_1998_H13N6                                   | Asia          | Anseriformes |
| CY003895_A_herring_gull_DE_475_1986_H13N2                                | North America | Gull         |
| CY004444_A_shorebird_DE_68_2004_H13N9                                    | North America | Shorebird    |
| CY005065_A_laughing_gull_Delaware_Bay_2838_1987_H13N2                    | North America | Gull         |
| CY014800_A_turkey_Minnesota_1012_1990_H13N2                              | North America | Galliformes  |
| CY015147_A_shorebird_Delaware_224_1997_H13N6                             | North America | Shorebird    |
| CY077001_A_black-headed_gull_Sweden_1_2005_H13N8                         | Europe        | Gull         |
| CY089638_A_gull_Maryland_704_1977_H13N6                                  | North America | Gull         |
| CY126289_A_ruddy_turnstone_Delaware_Bay_520_1988_H13N9                   | North America | Shorebird    |
| CY185364_A_common_snipe_Republic_of_Georgia_1_2012_H13N2                 | Europe        | Shorebird    |
| CY185490_A_black-headed_gull_Republic_of_Georgia_7_2011_H13N6            | Europe        | Gull         |
| CY185514_A_black-headed_gull_Georgia_1_2011_H13N8                        | Europe        | Gull         |
| CY195648_A_ring-billed_gull_Massachusetts_12DC00060_2012_H13N6           | North America | Gull         |
| CY195664_A_gull_Massachusetts_12JR00671_2012_H13N6                       | North America | Gull         |
| CY195802_A_ring-billed_gull_Massachusetts_13DC30736-1_2013_H13N8         | North America | Gull         |
| CY196612_A_glaucous-winged_gull_Southcentral_Alaska_11JR02474_2011_H13N6 | North America | Gull         |
| CY213621_A_glaucous-winged_gull_Southcentral_Alaska_15MB01557_2015_H13N6 | North America | Gull         |
| CY213696_A_glaucous-winged_gull_Southcentral_Alaska_15MB02016_2015_H13N8 | North America | Gull         |
| EU580589_A_black-headed_gull_Astrakhan_65_1983_H13N6                     | Europe        | Gull         |
| EU580591_A_gull_Astrakhan_1846_1998_H13N6                                | Europe        | Gull         |
| GQ907303_A_black_headed_gull_Mongolia_1766_2006_H13N6                    | Asia          | Gull         |
| GQ907319_A_Mongolian_gull_Mongolia_405_2007_H13N6                        | Asia          | Gull         |
| GU052229_A_gull_Astrakhan_1846_1998_H13N6                                | Europe        | Gull         |
| GU052234_A_blackhead_gull_Astrakhan_1421_1979_H13N6                      | Europe        | Gull         |
| GU052240_A_black-headed_gull_Astrakhan_458_1985_H13N6                    | Europe        | Gull         |
| GU052246_A_black-headed_gull_Astrakhan_44_1988_H13N6                     | Europe        | Gull         |
| HM060045_A_glaucous_gull_Alaska_44199-006_2006_H13N9                     | North America | Gull         |
| HM060047_A_lesser_snow_goose_Alaska_44199-115_2006_H13N9                 | North America | Anseriformes |
| JF775473_A_herring_gull_Mongolia_454_2008_H13N8                          | Asia          | Gull         |
| JX982948_A_gull_Maryland_1824_1978_H13N9                                 | North America | Gull         |
| KF462335_A_common_gull_Altai_811_2011_H13N2                              | Asia          | Gull         |
| KF772959_A_seagull_Chile_5775_2009_H13N9                                 | South America | Gull         |
| KJ372723_A_whale_Maine_328B_1984_H13N2                                   | North America | Mammal       |
| KM374021_A_herring_gull_Maine_ND0000047_2013_H13N6                       | North America | Gull         |
| KR010438_A_Eurasian_curlew_Liaoning_ZH-186_2014_H13N6                    | Asia          | Shorebird    |
| KR010446_A_Eurasian_curlew_Liaoning_ZH-385_2014_H13N8                    | Asia          | Shorebird    |
| KR087567_A_black-headed_gull_Netherlands_7_2009_H13N2                    | Europe        | Gull         |
| KX977643_A_black-headed_gull_Netherlands_10_2014_H13N6                   | Europe        | Gull         |
| KX977796_A_black-headed_gull_Netherlands_21_2008_H13N8                   | Europe        | Gull         |
| KX977809_A_black-headed_gull_Netherlands_20_2008_H13N8                   | Europe        | Gull         |
| KX978014_A_black-headed_gull_Netherlands_10_2010_H13N8                   | Europe        | Gull         |
| KX978042_A_black-headed_gull_Netherlands_15_2011_H13N8                   | Europe        | Gull         |
| KX978078_A_black-headed_gull_Netherlands_4_2010_H13N8                    | Europe        | Gull         |
| KX978087_A_black-headed_gull_Netherlands_9_2008_H13N8                    | Europe        | Gull         |
| KX978210_A_black-headed_gull_Netherlands_7_2013_H13N8                    | Europe        | Gull         |
| KX978395_A_black-headed_gull_Netherlands_25_2014_H13N2                   | Europe        | Gull         |
| KX978443_A_black-headed_gull_Netherlands_2_2011_H13N8                    | Europe        | Gull         |
| KX979037_A_black-headed_gull_Netherlands_39_2009_H13N6                   | Europe        | Gull         |
| KX979201_A_black-headed_gull_Netherlands_1_2010_H13N6                    | Europe        | Gull         |
| KX979210_A_black-headed_gull_Netherlands_83_2008_H13N8                   | Europe        | Gull         |
| KY131020_A_glaucous-winged_gull_Alaska_387_2013_H13N2                    | North America | Gull         |
| KY131075_A_glaucous-winged_gull_Alaska_544_2013_H13N2                    | North America | Gull         |
| KY131083_A_glaucous-winged_gull_Alaska_545_2013_H13N2                    | North America | Gull         |
| LC339630_A_duck_Hokkaido_W189_2006_H13N6                                 | Asia          | Anseriformes |
| M63530_A_gull_Maryland_1815_1979_H13N6                                   | North America | Gull         |
| M63539_A_gull_Maryland_1824_1978_H13N9                                   | North America | Gull         |
| MF145905_A_black-headed_gull_Netherlands_9_2013_H13N8                    | Europe        | Gull         |
| MF145975_A_black-headed_gull_Netherlands_1_2000_H13N8                    | Europe        | Gull         |
| MF146096_A_black-headed_gull_Netherlands_30_2008_H13N8                   | Europe        | Gull         |
| MF146491_A_black-headed_gull_Netherlands_16_2014_H13N6                   | Europe        | Gull         |
| MF146532_A_yellow-legged_gull_Georgia_4_2012_H13N8                       | Europe        | Gull         |
| MF146669_A_black-headed_gull_Netherlands_95_2012_H13N6                   | Europe        | Gull         |
| MF147149_A_black-headed_gull_Netherlands_49_2012_H13N6                   | Europe        | Gull         |
| MF461183_A_black-tailed_gull_Weihai_115_2016_H13N2                       | Asia          | Gull         |
| MH134621_A_brown-hooded_gull_Chile_C10765_2016_H13N2                     | South America | Gull         |
| MH498651_A_environment_Chile_C20128_2016_H13N9                           | South America | Environment  |
| MH498975_A_Franklins_gull_Chile_C20069_2016_H13N9                        | South America | Gull         |
| MH499031_A_Franklins_gull_Chile_C20118_2016_H13N9                        | South America | Gull         |
| MH499169_A_Franklins_gull_Chile_C17421_2016_H13N9                        | South America | Gull         |
| MH499209_A_black_skimmer_Chile_C20108_2016_H13N9                         | South America | Shorebird    |
| MH501031_A_gull_New_Jersey_UGAI15-3416_2015_H13N6                        | North America | Gull         |
| MH501055_A_gull_New_Jersey_UGAI15-3767_2015_H13N3                        | North America | Gull         |
| MH578852_A_semipalmated_sandpiper_Delaware_Bay_142_2007_H13N9            | North America | Shorebird    |
| MH579027_A_kelp_gull_Delaware_Bay_304_2007_H13N9                         | North America | Gull         |
| MH733687_A_ruddy_turnstone_Delaware_Bay_204_2009_H13N6                   | North America | Shorebird    |
| MH763876_A_ring-billed_gull_Minnesota_OPMNAI0926_2017_H13N6              | North America | Gull         |
| MH763995_A_ring-billed_gull_Minnesota_CLMNAI0891_2017_H13N6              | North America | Gull         |
| MH764222_A_ring-billed_gull_Minnesota_CLMNAI1301_2017_H13N2              | North America | Gull         |

|                                                                          |               |              |
|--------------------------------------------------------------------------|---------------|--------------|
| MH764254_A_ring-billed_gull_Minnesota_CLMNAI1539_2017_H13N6              | North America | Gull         |
| MK637083_A_herring_gull_Delaware_Bay_22_2014_H13N6                       | North America | Gull         |
| MN210164_A_Glaucous-Winged_Gull_Southcentral_Alaska_17MB03606_2017_H13N2 | North America | Gull         |
| MN210180_A_Glaucous-Winged_Gull_Southcentral_Alaska_17MB03638_2017_H13N2 | North America | Gull         |
| MN210196_A_Glaucous-Winged_Gull_Southcentral_Alaska_18MB00667_2018_H13N6 | North America | Gull         |
| MN210213_A_Glaucous-Winged_Gull_Southcentral_Alaska_18MB00688_2018_H13N6 | North America | Gull         |
| MW126757_A_slender-billed_gull_Ukraine_CHBZ-11_2009_H13N2                | Europe        | Gull         |
| MZ005192_A_Environmental_Santo_Domingo_GF89_2014_H13N2                   | South America | Environment  |
| MZ015622_A_Glaucous-Winged_Gull_Alaska_20MB02182_2020_H13N6              | North America | Gull         |
| MZ015717_A_Glaucous-Winged_Gull_Alaska_20MB02820_2020_H13N6              | North America | Gull         |
| OL355046_A_Kelp_gull_Peru_M8_2019_H13N6                                  | South America | Gull         |
| OL369951_A_silver_gull_Tasmania_06-0349-105_2006_H13N6                   | Oceania       | Gull         |
| OM965828_A_Red_Knot_Delaware_224_2021_H13N6                              | North America | Shorebird    |
| OP888638_A_environment_Chile_C39659_2018_H13N2                           | South America | Environment  |
| OP888736_A_Franklins_gull_Chile_C42119_2018_H13N2                        | South America | Gull         |
| OP888963_A_yellow-billed_teal_Chile_C38424_2018_H13N8                    | South America | Anseriformes |
| OQ366633_A_Great_black-backed_gull_DE_844_2022_H13N2                     | North America | Gull         |
| OQ366761_A_Laughing_Gull_DE_827_2022_H13N2                               | North America | Gull         |
| OQ691621_A_Franklins_gull_USA_D21-004347-2_MNAI1144_2017_H13N2           | North America | Gull         |
| OQ691622_A_Franklins_gull_USA_D21-004347-3_MNAI1172_2017_H13N6           | North America | Gull         |
| SKH13N6_M                                                                | SKH13N6       | Gull         |
