# Supplementary material for: Genetic Characterization and Phylogeographic Analysis of the First H13N6 Avian Influenza Virus Isolated from Vega Gull in South Korea
Source: MDPI journal article supplement (doi:10.3390/v16020285), 2024-02-12
Supplement: s1 [file s1]

**Table S11.** New amino acid variants found on the internal gene sequences of SKH13N6 compared to H13N6 reference virus (MDH13N6).

| Genes      | H13N6 Reference |                              |          |      | Pairwise<br>Identity (%)    Similarity (%) |  |
|------------|-----------------|------------------------------|----------|------|--------------------------------------------|--|
|            | Position        | A/gull/Maryland/<br>704/1977 | SKH13N6  |      |                                            |  |
| Accession  |                 | AGB51313.1                   | WHT33230 |      |                                            |  |
| <b>M1</b>  | 63              | V                            | I        | 99.2 | 100                                        |  |
|            | 231             | N                            | D        |      |                                            |  |
| Accession  |                 | AGB51314.1                   | WHT33231 |      |                                            |  |
| <b>M2</b>  | 13              | N                            | S        | 91.8 | 94.8                                       |  |
|            | 18              | R                            | K        |      |                                            |  |
|            | 47              | L                            | F        |      |                                            |  |
|            | 50              | F                            | C        |      |                                            |  |
|            | 55              | F                            | I        |      |                                            |  |
|            | 58              | G                            | E        |      |                                            |  |
|            | 65              | M                            | T        |      |                                            |  |
|            | 82              | S                            | N        |      |                                            |  |
| Accession  |                 | AGB51316.1                   | WHT33229 |      |                                            |  |
| <b>NP</b>  | 18              | D                            | E        | 97.2 | 99                                         |  |
|            | 23              | N                            | T        |      |                                            |  |
|            | 77              | K                            | R        |      |                                            |  |
|            | 85              | T                            | A        |      |                                            |  |
|            | 101             | D                            | E        |      |                                            |  |
|            | 129             | A                            | S        |      |                                            |  |
|            | 375             | N                            | S        |      |                                            |  |
|            | 396             | T                            | N        |      |                                            |  |
|            | 406             | V                            | I        |      |                                            |  |
|            | 433             | T                            | A        |      |                                            |  |
|            | 450             | NS                           | SA       |      |                                            |  |
|            | 482             | SN                           | NK       |      |                                            |  |
| Accession  |                 | AGB51317.1                   | WHT33232 |      |                                            |  |
| <b>NS1</b> | 26              | E                            | D        | 87.8 | 95.2                                       |  |
|            | 36              | I                            | L        |      |                                            |  |
|            | 48              | I                            | S        |      |                                            |  |
|            | 60              | A                            | S        |      |                                            |  |
|            | 63              | L                            | Q        |      |                                            |  |
|            | 70              | D                            | G        |      |                                            |  |
|            | 80              | N                            | T        |      |                                            |  |
|            | 90              | V                            | I        |      |                                            |  |
|            | 95              | P                            | T        |      |                                            |  |
|            | 118             | R                            | K        |      |                                            |  |
|            | 124             | L                            | I        |      |                                            |  |
|            | 127             | N                            | D        |      |                                            |  |
|            | 129             | V                            | T        |      |                                            |  |
|            | 137             | A                            | I        |      |                                            |  |
|            | 139             | D                            | N        |      |                                            |  |
|            | 145             | I                            | V        |      |                                            |  |
|            | 152             | S                            | N        |      |                                            |  |
|            | 180             | I                            | V        |      |                                            |  |
|            | 194             | V                            | I        |      |                                            |  |
|            | 197             | T                            | N        |      |                                            |  |
|            | 205             | S                            | I        |      |                                            |  |
|            | 215             | A                            | T        |      |                                            |  |
|            | 217             | K                            | E        |      |                                            |  |
|            | 219             | ER                           | KQ       |      |                                            |  |
|            | 222             | M                            | L        |      |                                            |  |
|            | 224             | G                            | R        |      |                                            |  |
|            | 226             | V                            | I        |      |                                            |  |
| Accession  |                 | AGB51318.1                   | WHT33233 |      |                                            |  |
| <b>NEP</b> | 14              | V                            | A        | 94.2 | 96.7                                       |  |
|            | 40              | L                            | I        |      |                                            |  |
|            | 48              | A                            | S        |      |                                            |  |
|            | 57              | L                            | S        |      |                                            |  |
|            | 63              | GK                           | RN       |      |                                            |  |
|            | 76              | I                            | M        |      |                                            |  |
| Accession  |                 | AGB51319.1                   | WHT33234 |      |                                            |  |
| <b>PA</b>  | 101             | E                            | D        | 98.5 | 99.6                                       |  |
|            | 211             | M                            | V        |      |                                            |  |
|            | 230             | R                            | T        |      |                                            |  |
|            | 272             | E                            | D        |      |                                            |  |
|            | 328             | R                            | K        |      |                                            |  |
|            | 342             | Q                            | L        |      |                                            |  |
|            | 348             | I                            | L        |      |                                            |  |
|            | 350             | N                            | S        |      |                                            |  |
|            | 391             | K                            | R        |      |                                            |  |
|            | 400             | Q                            | S        |      |                                            |  |
|            | 407             | V                            | I        |      |                                            |  |
| Accession  |                 | AGB51320.1                   | WHT33236 |      |                                            |  |
| <b>PB1</b> | 54              | K                            | T        | 97.8 | 99.2                                       |  |
|            | 57              | T                            | I        |      |                                            |  |
|            | 113             | V                            | I        |      |                                            |  |
|            | 171             | ME                           | LD       |      |                                            |  |
|            | 178             | E                            | G        |      |                                            |  |
|            | 180             | E                            | D        |      |                                            |  |
|            | 210             | Q                            | H        |      |                                            |  |
|            | 213             | NRR                          | SKK      |      |                                            |  |
|            | 328             | N                            | K        |      |                                            |  |
|            | 375             | N                            | S        |      |                                            |  |
|            | 388             | K                            | E        |      |                                            |  |
|            | 390             | EK                           | DN       |      |                                            |  |
|            | 667             | I                            | V        |      |                                            |  |
| Accession  |                 | AGB51319.1                   | WHT33238 |      |                                            |  |
| <b>PB2</b> | 6               | E                            | D        | 96.7 | 99.3                                       |  |
|            | 60              | D                            | E        |      |                                            |  |
|            | 106             | TS                           | AN       |      |                                            |  |
|            | 147             | I                            | V        |      |                                            |  |
|            | 180             | D                            | E        |      |                                            |  |
|            | 185             | I                            | V        |      |                                            |  |
|            | 292             | I                            | V        |      |                                            |  |
|            | 338             | I                            | V        |      |                                            |  |
|            | 374             | L                            | I        |      |                                            |  |
|            | 456             | N                            | S        |      |                                            |  |
|            | 470             | NA                           | ST       |      |                                            |  |
|            | 483             | M                            | T        |      |                                            |  |
|            | 511             | V                            | I        |      |                                            |  |
|            | 559             | MI                           | TV       |      |                                            |  |
|            | 567             | N                            | D        |      |                                            |  |
|            | 629             | SR                           | NK       |      |                                            |  |
|            | 636             | L                            | M        |      |                                            |  |
|            | 667             | V                            | I        |      |                                            |  |
|            | 674             | S                            | A        |      |                                            |  |
|            | 686             | V                            | I        |      |                                            |  |
|            | 743             | I                            | R        |      |                                            |  |
