# Supplementary material for: Genetic Characterization and Phylogeographic Analysis of the First H13N6 Avian Influenza Virus Isolated from Vega Gull in South Korea
Source: MDPI journal article supplement (doi:10.3390/v16020285), 2024-02-12
Supplement: s1 [file s1]

**Table S4.** List of isolates used in this study for PA gene analysis

| ISOLATE ID                                                                 | LOCATION      | HOST         |
|----------------------------------------------------------------------------|---------------|--------------|
| AAA43118_A_gull_Maryland_704_1977_H13N6                                    | North America | Gull         |
| ABB20099_A_A_shorebird_NJ_840_1986_H13N3                                   | North America | Shorebird    |
| ABB20123_A_A_herring_gull_Delaware_660_1988_H13N6                          | North America | Gull         |
| ABB21768_A_gull_Minnesota_945_1980_H13N6                                   | North America | Gull         |
| ABB86518_A_A_herring_gull_DE_475_1986_H13N2                                | North America | Gull         |
| ABB87341_A_shorebird_DE_68_2004_H13N9                                      | North America | Shorebird    |
| ABB87352_A_herring_gull_NJ_782_1986_H13N2                                  | North America | Gull         |
| ABB87818_A_laughing_gull_Delaware_Bay_2838_1987_H13N2                      | North America | Gull         |
| ABI84573_A_gull_Maryland_704_1977_H13N6                                    | North America | Gull         |
| ABI84719_A_turkey_Minnesota_I012_1990_H13N2                                | North America | Galliformes  |
| ABI85206_A_shorebird_Delaware_224_1997_H13N6                               | North America | Shorebird    |
| ACT84609_A_laughing_gull_New_Jersey_Sg-00559_2008_H13N9                    | North America | Gull         |
| ACU15642_A_shorebird_Delaware_221_2006_H13N9                               | North America | Shorebird    |
| ACV86837_A_black-headed_gull_Mongolia_1766_2006_H13N6                      | Asia          | Gull         |
| ACV86847_A_Mongolian_gull_Mongolia_401_2007_H13N6                          | Asia          | Gull         |
| ACZ46197_A_gull_Massachusetts_26_1980_H13N6                                | North America | Gull         |
| ACZ46210_A_gull_Maryland_1824_1978_H13N9                                   | North America | Gull         |
| ACZ46238_A_black-headed_gull_Astrakhan_65_1983_H13N6                       | Europe        | Gull         |
| ACZ46239_A_blackhead_gull_Astrakhan_1421_1979_H13N6                        | Europe        | Gull         |
| ACZ46240_A_black-headed_gull_Astrakhan_458_1985_H13N6                      | Europe        | Gull         |
| ACZ46241_A_black-headed_gull_Astrakhan_44_1988_H13N6                       | Europe        | Gull         |
| ADD16612_A_great_black-backed_gull_Newfoundland_296_2008_H13N2             | North America | Gull         |
| ADF29832_A_A_glaucous_gull_Alaska_44199-104_2006_H13N9                     | North America | Gull         |
| ADF29836_A_lesser_snow_goose_Alaska_44199-115_2006_H13N9                   | North America | Anseriformes |
| ADF29840_A_A_glaucous_gull_Alaska_44199-097_2006_H13N3                     | North America | Gull         |
| ADF29842_A_A_glaucous_gull_Alaska_44199-006_2006_H13N9                     | North America | Gull         |
| ADM07055_A_A_glaucous-winged_gull_Southcentral_Alaska_9JR0691R0_2009_H13N6 | North America | Gull         |
| ADM07066_A_A_glaucous-winged_gull_Southcentral_Alaska_9JR0738R0_2009_H13N6 | North America | Gull         |
| ADM07077_A_A_glaucous-winged_gull_Southcentral_Alaska_9JR0747R0_2009_H13N6 | North America | Gull         |
| ADM07088_A_A_glaucous-winged_gull_Southcentral_Alaska_9JR0769R0_2009_H13N6 | North America | Gull         |
| ADQ26647_A_black-headed_gull_Sweden_1_2005_H13N8                           | Europe        | Gull         |
| AEB66912_A_gull_Maryland_704_1977_H13N6                                    | North America | Gull         |
| AEB71109_A_herring_gull_Mongolia_454_2008_H13N8                            | Asia          | Gull         |
| AET74809_A_laughing_gull_Delaware_Bay_2838_1987_H13N2                      | North America | Gull         |
| AFL56743_A_mallard_Korea_SH38-45_2010_H13N2                                | Asia          | Anseriformes |
| AFP20877_A_ring-billed_gull_Quebec_02434-1_2009_H13N6                      | North America | Gull         |
| AFX83979_A_ruddy_turnstone_Delaware_Bay_520_1988_H13N9                     | North America | Shorebird    |
| AGB98190_A_glaucous-winged_gull_Southeastern_Alaska_9JR0822R0_2009_H13N6   | North America | Gull         |
| AGL57554_A_A_ring-billed_gull_Georgia_AI00-2658_2000_H13N6                 | North America | Gull         |
| AGL58708_A_laughing_gull_New_Jersey_Sg-00485_2008_H13N9                    | North America | Gull         |
| AGL60141_A_ruddy_turnstone_New_Jersey_AI09-294_2009_H13N6                  | North America | Shorebird    |
| AHA57188_A_seagull_Chile_5775_2009_H13N9                                   | South America | Gull         |
| AHJ58187_A_whale_Maine_328B_1984_H13N2                                     | North America | Mammal       |
| AHZ38834_A_black-headed_gull_Sweden_74342_2008_H13N8                       | Europe        | Gull         |
| AHZ39232_A_black-headed_gull_Republic_of_Georgia_7_2011_H13N6              | Europe        | Gull         |
| AHZ39291_A_black-headed_gull_Georgia_1_2011_H13N8                          | Europe        | Gull         |
| AHZ39351_A_black-headed_gull_Georgia_6_2011_H13N8                          | Europe        | Gull         |
| AHZ39446_A_yellow-legged_gull_Republic_of_Georgia_2_2012_H13N6             | Europe        | Gull         |
| AHZ39458_A_yellow-legged_gull_Republic_of_Georgia_3_2012_H13N6             | Europe        | Gull         |
| AHZ39482_A_yellow-legged_gull_Georgia_1_2013_H13N8                         | Europe        | Gull         |
| AHZ39505_A_yellow-legged_gull_Georgia_2_2013_H13N8                         | Europe        | Gull         |
| AHZ39553_A_black-headed_gull_Georgia_9_2011_H13N8                          | Europe        | Gull         |
| AHZ39565_A_Armenian_gull_Republic_of_Georgia_1_2012_H13N6                  | Europe        | Gull         |
| AHZ39577_A_common_snipe_Republic_of_Georgia_1_2012_H13N2                   | Europe        | Shorebird    |
| AHZ39633_A_yellow-legged_gull_Republic_of_Georgia_5_2012_H13N6             | Europe        | Gull         |
| AID48135_A_mallard_Dalian_DZ-137_2013_H13N6                                | Asia          | Anseriformes |
| AIN76262_A_herring_gull_Maine_ND0000047_2013_H13N6                         | North America | Gull         |
| AKD00236_A_Eurasian_curlew_Liaoning_ZH-385_2014_H13N8                      | Asia          | Shorebird    |
| AKD00246_A_Eurasian_curlew_Liaoning_ZH-186_2014_H13N6                      | Asia          | Shorebird    |
| AKH14241_A_black-headed_gull_Netherlands_7_2009_H13N2                      | Europe        | Gull         |
| ALZ46778_A_gull_Massachusetts_12JR00671_2012_H13N6                         | North America | Gull         |
| ALZ46985_A_ring-billed_gull_Massachusetts_13DC30736-1_2013_H13N8           | North America | Gull         |
| ALZ48197_A_glaucous-winged_gull_Southcentral_Alaska_11JR02474_2011_H13N6   | North America | Gull         |
| APC30503_A_black-headed_gull_Netherlands_1_2010_H13N6                      | Europe        | Gull         |
| APC30642_A_black-headed_gull_Netherlands_2_2007_H13N6                      | Europe        | Gull         |
| APC30658_A_black-headed_gull_Netherlands_27_2014_H13N2                     | Europe        | Gull         |
| APC30691_A_black-headed_gull_Netherlands_1_2014_H13N2                      | Europe        | Gull         |
| APC30743_A_black-headed_gull_Netherlands_6_2010_H13N8                      | Europe        | Gull         |
| APC30855_A_black-headed_gull_Netherlands_55_2008_H13N8                     | Europe        | Gull         |
| APC30910_A_black-headed_gull_Netherlands_23_2014_H13N2                     | Europe        | Gull         |
| APC30932_A_black-headed_gull_Netherlands_20_2008_H13N8                     | Europe        | Gull         |
| APC31012_A_black-headed_gull_Netherlands_88_2012_H13N6                     | Europe        | Gull         |
| APC31019_A_black-headed_gull_Netherlands_82_2012_H13N6                     | Europe        | Gull         |
| APC31117_A_black-headed_gull_Netherlands_10_2013_H13N8                     | Europe        | Gull         |
| APC31127_A_black-headed_gull_Netherlands_8_2010_H13N2                      | Europe        | Gull         |
| APC31230_A_black-headed_gull_Netherlands_2_2011_H13N8                      | Europe        | Gull         |
| APC31234_A_black-headed_gull_Netherlands_11_2014_H13N6                     | Europe        | Gull         |
| APC31411_A_black-headed_gull_Netherlands_52_2012_H13N6                     | Europe        | Gull         |

|                                                                          |               |                       |
|--------------------------------------------------------------------------|---------------|-----------------------|
| APC31443_A_black-headed_gull_Netherlands_134_2012_H13N6                  | Europe        | Gull                  |
| APC31451_A_black-headed_gull_Netherlands_17_2009_H13N3                   | Europe        | Gull                  |
| APC31677_A_black-headed_gull_Netherlands_12_2010_H13N2                   | Europe        | Gull                  |
| APC32034_A_black-headed_gull_Netherlands_3_2014_H13N6                    | Europe        | Gull                  |
| APC32074_A_black-headed_gull_Netherlands_106_2012_H13N6                  | Europe        | Gull                  |
| APC32210_A_black-headed_gull_Netherlands_10_2014_H13N6                   | Europe        | Gull                  |
| APC32215_A_black-headed_gull_Netherlands_2_2012_H13N6                    | Europe        | Gull                  |
| APC32322_A_black-headed_gull_Netherlands_83_2012_H13N6                   | Europe        | Gull                  |
| APC32325_A_black-headed_gull_Netherlands_113_2012_H13N6                  | Europe        | Gull                  |
| APC32352_A_black-headed_gull_Netherlands_18_2011_H13N8                   | Europe        | Gull                  |
| APC32450_A_black-headed_gull_Netherlands_31_2009_H13N2                   | Europe        | Gull                  |
| APC32477_A_black-headed_gull_Netherlands_39_2009_H13N6                   | Europe        | Gull                  |
| APC32602_A_black-headed_gull_Netherlands_10_2010_H13N8                   | Europe        | Gull                  |
| APC32784_A_black-headed_gull_Netherlands_105_2012_H13N6                  | Europe        | Gull                  |
| APC32858_A_black-headed_gull_Netherlands_5_2014_H13N6                    | Europe        | Gull                  |
| APC32866_A_black-headed_gull_Netherlands_27_2009_H13N2                   | Europe        | Gull                  |
| APC32944_A_black-headed_gull_Netherlands_9_2008_H13N8                    | Europe        | Gull                  |
| APC33184_A_black-headed_gull_Netherlands_9_2009_H13N2                    | Europe        | Gull                  |
| APH09493_A_glaucous-winged_gull_Alaska_387_2013_H13N2                    | North America | Gull                  |
| APH09528_A_glaucous-winged_gull_Alaska_414_2013_H13N2                    | North America | Gull                  |
| APH09552_A_glaucous-winged_gull_Alaska_458_2013_H13N2                    | North America | Gull                  |
| APH09588_A_glaucous-winged_gull_Alaska_545_2013_H13N2                    | North America | Gull                  |
| APH09672_A_glaucous-winged_gull_Alaska_667_2013_H13N2                    | North America | Gull                  |
| APY16425_A_glaucous-winged_gull_Southcentral_Alaska_15MB01610_2015_H13N6 | North America | Gull                  |
| APY16565_A_glaucous-winged_gull_Southcentral_Alaska_15MB01557_2015_H13N6 | North America | Gull                  |
| APY16577_A_glaucous-winged_gull_Southcentral_Alaska_15MB01429_2015_H13N6 | North America | Gull                  |
| ARX91508_A_black-headed_gull_Netherlands_7_2008_H13N8                    | Europe        | Gull                  |
| ARX91631_A_black-headed_gull_Netherlands_3_2009_H13N2                    | Europe        | Gull                  |
| ARX91800_A_A_yellow-legged_gull_Georgia_1_2011_H13N8                     | Europe        | Gull                  |
| ARX91805_A_black-headed_gull_Netherlands_67_2008_H13N8                   | Europe        | Gull                  |
| ARX92100_A_black-headed_gull_Netherlands_26_2011_H13N8                   | Europe        | Gull                  |
| ARX92118_A_black-headed_gull_Netherlands_49_2012_H13N6                   | Europe        | Gull                  |
| ARX92236_A_yellow-legged_gull_Georgia_4_2012_H13N8                       | Europe        | Gull                  |
| ARX92421_A_black-headed_gull_Netherlands_131_2012_H13N6                  | Europe        | Gull                  |
| ARX92428_A_black-headed_gull_Netherlands_9_2013_H13N8                    | Europe        | Gull                  |
| ARX92578_A_black-headed_gull_Netherlands_3_2008_H13N8                    | Europe        | Gull                  |
| ARX92684_A_black-headed_gull_Netherlands_1_2012_H13N6                    | Europe        | Gull                  |
| ARX93336_A_black-headed_gull_Netherlands_93_2008_H13N8                   | Europe        | Gull                  |
| ARX93445_A_black-headed_gull_Netherlands_66_2008_H13N8                   | Europe        | Gull                  |
| ARX93830_A_black-headed_gull_Netherlands_17_2012_H13N6                   | Europe        | Gull                  |
| ARX93897_A_black-headed_gull_Netherlands_44_2008_H13N8                   | Europe        | Gull                  |
| ARX93919_A_black-headed_gull_Netherlands_12_2011_H13N8                   | Europe        | Gull                  |
| ARX94048_A_black-headed_gull_Netherlands_97_2012_H13N6                   | Europe        | Gull                  |
| ARX94076_A_black-headed_gull_Netherlands_14_2011_H13N8                   | Europe        | Gull                  |
| ARX94086_A_black-headed_gull_Netherlands_2_2008_H13N8                    | Europe        | Gull                  |
| ARX94163_A_black-headed_gull_Netherlands_16_2014_H13N6                   | Europe        | Gull                  |
| ARX94193_A_black-headed_gull_Netherlands_52_2008_H13N8                   | Europe        | Gull                  |
| ARX94256_A_black-headed_gull_Netherlands_24_2008_H13N8                   | Europe        | Gull                  |
| ARX94380_A_black-headed_gull_Netherlands_3_2011_H13N8                    | Europe        | Gull                  |
| ARX94385_A_black-headed_gull_Netherlands_95_2012_H13N6                   | Europe        | Gull                  |
| ARX94408_A_black-headed_gull_Netherlands_2_2010_H13N8                    | Europe        | Gull                  |
| ARX94514_A_black-headed_gull_Netherlands_38_2011_H13N8                   | Europe        | Gull                  |
| ARX94723_A_black-headed_gull_Netherlands_6_2013_H13N8                    | Europe        | Gull                  |
| ARX94956_A_black-headed_gull_Netherlands_1_2000_H13N8                    | Europe        | Gull                  |
| ASN77224_A_herring_gull_Massachusetts_A00080257_2006_H13N2               | North America | Gull                  |
| ASO97742_A_black-tailed_gull_Weihai_115_2016_H13N2                       | Asia          | Gull                  |
| ASO97752_A_black-tailed_gull_Weihai_17_2016_H13N8                        | Asia          | Gull                  |
| AVO00175_A_laughing_gull_New_Jersey_UGAI17-2839_2017_H13N6               | North America | Gull                  |
| AWF93201_A_A_environment_Chile_C7144_2016_H13N2                          | South America | Environment           |
| AWF93226_A_A_environment_Chile_C7125_2016_H13N2                          | South America | Environment           |
| AWF93300_A_A_whimbrel_Chile_C10834_2016_H13N2                            | South America | Shorebird             |
| AWF93404_A_A_environment_Chile_C7039_2016_H13N2                          | South America | Environment           |
| AWF93480_A_brown-hooded_gull_Chile_C10765_2016_H13N2                     | South America | Gull                  |
| AWF93497_A_A_whimbrel_Chile_C12523_2016_H13N2                            | South America | Shorebird             |
| AWV92019_A_ruddy_turnstone_New_Jersey_AI01-1407_2001_H13N6               | North America | Shorebird             |
| AWV92301_A_gull_New_Jersey_UGAI15-3767_2015_H13N3                        | North America | Gull                  |
| AWV93205_A_ruddy_turnstone_New_Jersey_AI12-1737_2012_H13N6               | North America | Shorebird             |
| AXB35131_A_A_environment_New_Jersey_AI00-2413_2000_H13N6                 | North America | Environment           |
| AXB35143_A_herring_gull_New_Jersey_AI07-418_2007_H13N9                   | North America | Gull                  |
| AXE75371_A_A_environment_Chile_C20076_2016_H13N9                         | South America | Environment           |
| AXF49024_A_A_Franklins_gull_Chile_C17421_2016_H13N9                      | South America | Gull                  |
| AXF49041_A_A_Franklins_gull_Chile_C20061_2016_H13N9                      | South America | Gull                  |
| AXF49060_A_Franklins_gull_Chile_C20069_2016_H13N9                        | South America | Gull                  |
| AXF49064_A_Franklins_gull_Chile_C20070_2016_H13N9                        | South America | Gull                  |
| AXF49117_A_Franklins_gull_Chile_C20118_2016_H13N9                        | South America | Gull                  |
| AXF49127_A_Franklins_gull_Chile_C20149_2016_H13N9                        | South America | Gull                  |
| AXF49190_A_black_skimmer_Chile_C20100_2016_H13N9                         | South America | Shorebird             |
| AXF49310_A_elegant_tern_Chile_C20093_2016_H13N9                          | South America | Other Charadriiformes |
| AXF49346_A_environment_Chile_C20125_2016_H13N9                           | South America | Environment           |
| AXF49393_A_environment_Chile_C20143_2016_H13N9                           | South America | Environment           |
| AXF49516_A_environment_Chile_C20177_2016_H13N9                           | South America | Environment           |
| AXF49610_A_kelp_gull_Chile_C27733_2017_H13N8                             | South America | Gull                  |

|                                                                          |               |                       |
|--------------------------------------------------------------------------|---------------|-----------------------|
| AXF49625_A_kelp_gull_Chile_C8594_2016_H13N2                              | South America | Gull                  |
| AXF49629_A_kelp_gull_Chile_C8595_2016_H13N2                              | South America | Gull                  |
| AXF49674_A_kelp_gull_Chile_C8609_2016_H13N2                              | South America | Gull                  |
| AXF49716_A_whimbrel_Chile_C20075_2016_H13N9                              | South America | Shorebird             |
| AXK58839_A_ruddy_turnstone_Delaware_Bay_131_2004_H13N9                   | North America | Shorebird             |
| AXO65326_A_ring-billed_gull_Minnesota_OPMNAI0816_2017_H13N8              | North America | Gull                  |
| AXO65338_A_ring-billed_gull_Minnesota_CLMNAI1320_2017_H13N8              | North America | Gull                  |
| AXO65350_A_ring-billed_gull_Minnesota_OPMNAI0926_2017_H13N6              | North America | Gull                  |
| AXO65456_A_ring-billed_gull_Minnesota_CLMNAI1025_2017_H13N6              | North America | Gull                  |
| AXO65527_A_ring-billed_gull_Minnesota_CLMNAI0891_2017_H13N6              | North America | Gull                  |
| AXO65637_A_ring-billed_gull_Minnesota_OPMNAI0800_2017_H13N8              | North America | Gull                  |
| AXO65666_A_ring-billed_gull_Minnesota_CLMNAI1199_2017_H13N2              | North America | Gull                  |
| AXO65774_A_ring-billed_gull_Minnesota_CLMNAI0939_2017_H13N6              | North America | Gull                  |
| AXO65878_A_ring-billed_gull_Minnesota_CLMNAI1420_2017_H13N6              | North America | Gull                  |
| AXO65890_A_ring-billed_gull_Minnesota_CLMNAI1501_2017_H13N2              | North America | Gull                  |
| AXO65902_A_ring-billed_gull_Minnesota_CLMNAI1529_2017_H13N6              | North America | Gull                  |
| AXO65914_A_ring-billed_gull_Minnesota_CLMNAI1539_2017_H13N6              | North America | Gull                  |
| AXY66760_A_Duck_China_Weihai_2017_H13N8                                  | Asia          | Anseriformes          |
| AZR38852_A_laughing_gull_Delaware_Bay_451_2018_H13N6                     | North America | Gull                  |
| AZV03313_A_kelp_gull_Delaware_Bay_441_2018_H13N6                         | North America | Gull                  |
| BAF37820_A_A_Duck_Siberia_272_1998_H13N6                                 | Asia          | Anseriformes          |
| BBB38799_A_A_Duck_Hokkaido_W189_2006_H13N6                               | Asia          | Anseriformes          |
| CCH50637_A_common_gull_Norway_10_1313_2009_H13N2                         | Europe        | Gull                  |
| QBL97183_A_Red_Knot_Delaware_Bay_489_2010_H13N6                          | North America | Shorebird             |
| QBM14651_A_herring_gull_Delaware_Bay_22_2014_H13N6                       | North America | Gull                  |
| QBM14723_A_laughing_gull_Delaware_Bay_39_2014_H13N6                      | North America | Gull                  |
| QDP69636_A_glaucous_Gull_Northern_Alaska_18AR00289_2018_H13N6            | North America | Gull                  |
| QDP69672_A_glaucous-Winged_Gull_Southcentral_Alaska_17MB03606_2017_H13N2 | North America | Gull                  |
| QDP69684_A_glaucous-Winged_Gull_Southcentral_Alaska_17MB03625_2017_H13N2 | North America | Gull                  |
| QDP69696_A_glaucous-Winged_Gull_Southcentral_Alaska_17MB03638_2017_H13N2 | North America | Gull                  |
| QDP69720_A_glaucous-Winged_Gull_Southcentral_Alaska_18MB00667_2018_H13N6 | North America | Gull                  |
| QDP69732_A_glaucous-Winged_Gull_Southcentral_Alaska_18MB00676_2018_H13N6 | North America | Gull                  |
| QDP69746_A_glaucous-Winged_Gull_Southcentral_Alaska_18MB00688_2018_H13N6 | North America | Gull                  |
| QDP69806_A_glaucous-Winged_Gull_Southcentral_Alaska_18MB03351_2018_H13N6 | North America | Gull                  |
| QDP69830_A_herring_gull_Massachusetts_A00648685_2008_H13N2               | North America | Gull                  |
| QDP69842_A_herring_gull_Massachusetts_A00648696_2008_H13N2               | North America | Gull                  |
| QGR25240_A_Red_Knot_Delaware_Bay_3_2019_H13N6                            | North America | Shorebird             |
| QOL20606_A_slender-billed_gull_Ukraine_CHBZ-11_2009_H13N2                | Europe        | Gull                  |
| QOL24244_A_shelduck_Ukraine_KT-9-2-11_2016_H13N6                         | Europe        | Anseriformes          |
| QTO29229_A_glaucous-winged_gull_Alaska_AK18-288_2018_H13N6               | North America | Gull                  |
| QTO33858_A_Red_Knot_Delaware_Bay_605_2020_H13N6                          | North America | Shorebird             |
| QTO34595_A_Red_Knot_Delaware_Bay_420_2020_H13N6                          | North America | Shorebird             |
| QUD20220_A_environmental_Santo_Domingo_GF89_2014_H13N2                   | South America | Environment           |
| QUE37719_A_glaucous-Winged_Gull_Alaska_20MB02182_2020_H13N6              | North America | Gull                  |
| QUE37738_A_glaucous-Winged_Gull_Alaska_20MB02831_2020_H13N6              | North America | Gull                  |
| QUE37802_A_glaucous-Winged_Gull_Alaska_20MB02498_2020_H13N6              | North America | Gull                  |
| QUE37823_A_glaucous-Winged_Gull_Alaska_20MB02836_2020_H13N6              | North America | Gull                  |
| QUE37852_A_glaucous-Winged_Gull_Alaska_20MB02534_2020_H13N6              | North America | Gull                  |
| QUE37873_A_glaucous-Winged_Gull_Alaska_20MB02820_2020_H13N6              | North America | Gull                  |
| SKH13N6_PA                                                               | SKH13N6       | Gull                  |
| UEE12801_A_kelp_gull_Peru_M8_2019_H13N6                                  | South America | Gull                  |
| UEF69688_A_silver_gull_Tasmania_06-0349-105_2006_H13N6                   | Oceania       | Gull                  |
| UNA44622_A_Red_Knot_Delaware_224_2021_H13N6                              | North America | Shorebird             |
| UNA44782_A_laughing_gull_Delaware_294_2021_H13N6                         | North America | Gull                  |
| UZU88881_A_kelp_gull_Chile_C25097_2017_H13N9                             | South America | Gull                  |
| UZU88951_A_kelp_gull_Chile_C39002_2018_H13N2                             | South America | Gull                  |
| UZU89022_A_environment_Chile_C39659_2018_H13N2                           | South America | Environment           |
| UZU89087_A_kelpgull_Chile_C24014_2017_H13N9                              | South America | Gull                  |
| UZU89146_A_kelp_gull_Chile_C41225_2018_H13N6                             | South America | Gull                  |
| UZU89223_A_kelp_gull_Chile_C41186_2018_H13N8                             | South America | Gull                  |
| UZU89270_A_environment_Chile_C39624_2018_H13N2                           | South America | Environment           |
| UZU89318_A_southern_lapwing_Chile_C36480_2018_H13N8                      | South America | Other Charadriiformes |
| UZU89424_A_Franklins_gull_Chile_C33636_2017_H13N2                        | South America | Gull                  |
| UZU89505_A_yellow-billed_teal_Chile_C38424_2018_H13N8                    | South America | Anseriformes          |
| WCJ14708_A_great_black-backed_gull_DE_844_2022_H13N2                     | North America | Gull                  |
| WCJ14788_A_laughing_gull_DE_801_2022_H13N2                               | North America | Gull                  |
| WCJ14905_A_laughing_gull_DE_827_2022_H13N2                               | North America | Gull                  |
| WCJ17359_A_laughing_gull_DE_809_2022_H13N2                               | North America | Gull                  |
| WCJ17507_A_Red_Knot_DE_1087_2022_H13N6                                   | North America | Shorebird             |
| WEV00533_A_Franklins_gull_USA_D21-004347-2_MNAI1144_2017_H13N2           | North America | Gull                  |
| WEV00535_A_Franklins_gull_USA_D21-004347-3_MNAI1172_2017_H13N6           | North America | Gull                  |
| WEV00537_A_Franklins_gull_USA_D21-004347-4_MNAI1365_2017_H13N2           | North America | Gull                  |
