# Supplementary material for: Genetic Characterization and Phylogeographic Analysis of the First H13N6 Avian Influenza Virus Isolated from Vega Gull in South Korea
Source: MDPI journal article supplement (doi:10.3390/v16020285), 2024-02-12
Supplement: s1 [file s1]

**Table S10.** New amino acid variants found on the gene sequences of SKH13N6 compared to other H13N6 isolates in Influenza Virus Database and GenBank

| <b>Genes<sup>1</sup></b> | <b>Position</b> | <b>Database consensus</b> | <b>SKH13N6</b> |
|--------------------------|-----------------|---------------------------|----------------|
| Accession                |                 |                           | WHT33227       |
| <b>HA</b><br>(n258)      | 13              | G/S/R                     | N              |
|                          | 199             | V                         | I              |
|                          | 409             | I                         | F              |
|                          | 423             | L                         | F              |
|                          | 432             | T                         | P              |
|                          | 435             | W                         | C              |
|                          | 442             | L                         | F              |
|                          | 456             | A                         | V              |
|                          | 466             | R/K/Q                     | G              |
|                          | 475             | D                         | E              |
|                          | 483             | LL                        | FF             |
|                          | 500             | Y                         | S              |
|                          | 504             | E/K                       | D              |
|                          | 539             | S                         | T              |
|                          | 546             | L/P                       | F              |
| Accession                |                 |                           | WHT33228       |
| <b>NA</b><br>(n224)      | 253             | A                         | T              |
|                          | 391             | G                         | S              |
| Accession                |                 |                           | WHT33229       |
| <b>NP</b><br>(n293)      | 396             | T                         | N              |
| Accession                |                 |                           | WHT33232       |
| <b>NS1</b><br>(n295)     | 205             | S                         | I              |
| Accession                |                 |                           | WHT33234       |
| <b>PA</b><br>(n275)      | 211             | M                         | V              |
|                          | 230             | R                         | T              |
| Accession                |                 |                           | WHT33235       |
| <b>PA-X</b><br>(n250)    | 230             | E                         | Q              |
| Accession                |                 |                           | WHT33238       |
| <b>PB2</b><br>(n282)     | 6               | E                         | D              |
|                          | 629             | S                         | N              |
|                          | 743             | I                         | R              |

<sup>1</sup>Number of analyzed sequences is listed below the gene name
