# Supplementary material for: Genetic Characterization and Phylogeographic Analysis of the First H13N6 Avian Influenza Virus Isolated from Vega Gull in South Korea
Source: Viruses. 2024 Feb 12;16(2):285. doi: 10.3390/v16020285 (PMC10891532; doi:10.3390/v16020285)
Supplement: Supplementary file 1 [file viruses-16-00285-s001.zip]

Archive with 19 entries (19 files):
- Figure S1.pdf
- Figure S2.pdf
- Figure S3.pdf
- Figure S4.pdf
- Figure S5.pdf
- Figure S6.pdf
- Figure S7.pdf
- Figure S8.pdf
- Table S1 Primers.pdf
- Table S10.pdf
- Table S11.pdf
- Table S2 PB2 isolates.pdf
- Table S3 PB1 isolates.pdf
- Table S4 PA isolates.pdf
- Table S5 HA isolates.pdf
- Table S6 NP isolates.pdf
- Table S7 NA isolates.pdf
- Table S8 M isolates.pdf
- Table S9 NS isolates.pdf
